# Supplementary material for: Suspected Pituitary Apoplexy: Clinical Presentation, Diagnostic Imaging Findings and Outcome in 19 Dogs
Source: MDPI journal article supplement (doi:10.3390/vetsci9040191), 2022-04-15
Supplement: s1 [file s1]

**Table S1.** Detailed description of neurological examination findings for each dog. Pupillary light reflex (PLR). No alterations detected (\).

| Signalment                             | Behaviour                           | Mental status | Posture           | Gait                            | Postural reactions                       | Cranial nerves evaluation | Epileptic seizures | Hyperalgesia |
|----------------------------------------|-------------------------------------|---------------|-------------------|---------------------------------|------------------------------------------|---------------------------|--------------------|--------------|
| 1. Mixed breed MN, 9.75 y, 24.6 Kg     | \                                   | \             | \                 | \                               | \                                        | \                         | No                 | \            |
| 2. Italian hound F, 11.5 y, 14.8 Kg    | \                                   | Obtundation   | \                 | \                               | \                                        | \                         | No                 | \            |
| 3. mixed breed FN, 12.7 y, 4.7 Kg      | \                                   | Obtundation   | \                 | Proprioceptive ataxia hindlimbs | Deficit left anterior and posterior limb | \                         | No                 | Cervical     |
| 4. Italian bracco dog F, 12.8 y, 27 Kg | Compulsion, circling, head pressing | Obtundation   | Neck vetroflexion | Hindlimbs hypometria            | Deficit 4 limbs                          | \                         | No                 | Cervical     |
| 5. Mixed breed FN, 12.7 y, 30 Kg       | Vocalizations                       | \             | \                 | \                               | \                                        | \                         | No                 | \            |
| 6. Beagle FN, 7.6 y, 16.6 Kg           | \                                   | \             | \                 | \                               | \                                        | \                         | No                 | \            |
| 7. Labrador retriever F, 5 y, 31.2 Kg  | Anxious behaviour                   | \             | \                 | \                               | \                                        | \                         | Yes                | \            |

|                                               |                                                         |             |   |   |                             |                                                                                                          |     |         |
|-----------------------------------------------|---------------------------------------------------------|-------------|---|---|-----------------------------|----------------------------------------------------------------------------------------------------------|-----|---------|
| 8. Labrador retriever<br>FN, 10.8 y,<br>35 Kg | \                                                       | Obtundation | \ | \ | \                           | \                                                                                                        | Yes | \       |
| 9. Mixed breed<br>FN, 5.8 y,<br>21 Kg         | Compulsive<br>behaviour                                 | \           | \ | \ | Deficit 4<br>limbs          | Reduced<br>menace<br>response<br>right side                                                              | No  | Diffuse |
| 10. Labrador retriever<br>FN, 8.6 y,<br>29 Kg | \                                                       | \           | \ | \ | \                           | \                                                                                                        | Yes | \       |
| 11. Boxer<br>FN, 11.4 y,<br>27.4 Kg           | Disorientation,<br>circling,<br>compulsive<br>behaviour | \           | \ | \ | \                           | \                                                                                                        | No  | \       |
| 12. Springer Spaniel<br>M, 13.7 y,<br>18.7 Kg | Disorientation,<br>anxious<br>behaviour                 | \           | \ | \ | \                           | Bilaterally<br>absent<br>menace<br>response,<br>bilaterally<br>absent<br>direct and<br>consensual<br>PLR | Yes | \       |
| 13. Mixed breed<br>M, 11.1 y,<br>33 Kg        | Compulsive<br>behaviour,<br>circling                    | \           | \ | \ | Deficit<br>left<br>hindlimb | Bilaterally<br>absent<br>menace<br>response                                                              | No  | \       |
| 14. Mixed breed<br>M, 9.8 y,<br>14.5 Kg       | Disorientation                                          | \           | \ | \ | \                           | \                                                                                                        | No  | \       |

|                                              |                                                              |             |   |                                  |                    |                                                                                                           |     |   |
|----------------------------------------------|--------------------------------------------------------------|-------------|---|----------------------------------|--------------------|-----------------------------------------------------------------------------------------------------------|-----|---|
| 15. Corso<br>dog<br>FN, 9.4 y,<br>43 Kg      | \                                                            | \           | \ | Tetraparesis                     | \                  | \                                                                                                         | No  | \ |
| 16. English<br>bulldog<br>M, 6.1 y, 28<br>Kg | Disorientation,<br>head pressing,<br>aggressive<br>behaviour | Obtundation | \ | \                                | \                  | Bilaterally<br>absent<br>menace<br>response,<br>bilaterally<br>reduced<br>direct and<br>consensual<br>PLR | No  | \ |
| 17. Mixed<br>breed<br>M, 9.3 y, 9.3<br>Kg    | \                                                            | Obtundation | \ | \                                | \                  | \                                                                                                         | Yes | \ |
| 18. Mixed<br>breed<br>M, 3.2 y, 15<br>Kg     | Disorientation,<br>aggressive<br>behaviour                   | \           | \ | Proprioceptive<br>ataxia 4 limbs | Deficit 4<br>limbs | \                                                                                                         | Yes | \ |
| 19. Mixed<br>breed<br>M, 11.1 y,<br>27.6 Kg  | Disorientation,<br>vocalizations                             | Obtundation | \ | \                                | \                  | \                                                                                                         | No  | \ |
